# Supplementary material
Source: PubMed Central journal article supplement (PMC6201713)
Supplement: supp_6.4.E463_2017-0153-1-at.pdf [file supp_6.4.E463_2017-0153-1-at.pdf]

## Appendix 1 (as supplied by the authors): Completion rate sensitivity analysis in the sample

| <b>Supplementary Table A1: Completion Rate Sensitivity Analysis in the Sample (n=8,520)</b>                                                                                                                                                                                                                                                                                                                                                                                                                                                                                                                                                                                                                                                                                                                                                                                                                                 |                           |                             |                      |
|-----------------------------------------------------------------------------------------------------------------------------------------------------------------------------------------------------------------------------------------------------------------------------------------------------------------------------------------------------------------------------------------------------------------------------------------------------------------------------------------------------------------------------------------------------------------------------------------------------------------------------------------------------------------------------------------------------------------------------------------------------------------------------------------------------------------------------------------------------------------------------------------------------------------------------|---------------------------|-----------------------------|----------------------|
| Variable                                                                                                                                                                                                                                                                                                                                                                                                                                                                                                                                                                                                                                                                                                                                                                                                                                                                                                                    | Complete Data % (n=4,199) | Incomplete Data % (n=4,321) | OR (95% CI)          |
| <b>Sex</b>                                                                                                                                                                                                                                                                                                                                                                                                                                                                                                                                                                                                                                                                                                                                                                                                                                                                                                                  |                           |                             |                      |
| Male                                                                                                                                                                                                                                                                                                                                                                                                                                                                                                                                                                                                                                                                                                                                                                                                                                                                                                                        | 67.0 (2,806)              | 66.5 (2,180)                | 1.00                 |
| Female                                                                                                                                                                                                                                                                                                                                                                                                                                                                                                                                                                                                                                                                                                                                                                                                                                                                                                                      | 33.0 (1,379)              | 33.5 (1,096)                | 1.02 (0.93, 1.13)    |
| <b>Age</b>                                                                                                                                                                                                                                                                                                                                                                                                                                                                                                                                                                                                                                                                                                                                                                                                                                                                                                                  |                           |                             |                      |
| 19-29 years                                                                                                                                                                                                                                                                                                                                                                                                                                                                                                                                                                                                                                                                                                                                                                                                                                                                                                                 | 7.4 (307)                 | 8.2 (269)                   | 1.00                 |
| 30-39 years                                                                                                                                                                                                                                                                                                                                                                                                                                                                                                                                                                                                                                                                                                                                                                                                                                                                                                                 | 27.9 (1164)               | 31.8 (1,045)                | 1.03 (0.85, 1.23)    |
| 40-49 years                                                                                                                                                                                                                                                                                                                                                                                                                                                                                                                                                                                                                                                                                                                                                                                                                                                                                                                 | 37.1 (1,547)              | 35.5 (1,167)                | 0.86 (0.72, 1.03)    |
| 50-59 years                                                                                                                                                                                                                                                                                                                                                                                                                                                                                                                                                                                                                                                                                                                                                                                                                                                                                                                 | 24.6 (1,025)              | 21.7 (715)                  | 0.80 (0.66, 0.96)*   |
| 60 and older years                                                                                                                                                                                                                                                                                                                                                                                                                                                                                                                                                                                                                                                                                                                                                                                                                                                                                                          | 3.1 (131)                 | 2.8 (93)                    | 0.81 (0.59, 1.12)    |
| <b>Marital Status</b>                                                                                                                                                                                                                                                                                                                                                                                                                                                                                                                                                                                                                                                                                                                                                                                                                                                                                                       |                           |                             |                      |
| Single                                                                                                                                                                                                                                                                                                                                                                                                                                                                                                                                                                                                                                                                                                                                                                                                                                                                                                                      | 10.1 (420)                | 11.7 (379)                  | 1.00                 |
| Married/ Common-law/ Re-married                                                                                                                                                                                                                                                                                                                                                                                                                                                                                                                                                                                                                                                                                                                                                                                                                                                                                             | 79.1 (3,298)              | 78.4 (2,540)                | 0.85 (0.74, 0.99)*   |
| Separated/ Divorced/ Widowed                                                                                                                                                                                                                                                                                                                                                                                                                                                                                                                                                                                                                                                                                                                                                                                                                                                                                                | 10.8 (450)                | 9.9 (321)                   | 0.79 (0.65, 0.97)*   |
| <b>Provincial Region of Residence</b>                                                                                                                                                                                                                                                                                                                                                                                                                                                                                                                                                                                                                                                                                                                                                                                                                                                                                       |                           |                             |                      |
| Western Canada (BC, AB, SK, MB) and Territories (YK, NWT, NVT)                                                                                                                                                                                                                                                                                                                                                                                                                                                                                                                                                                                                                                                                                                                                                                                                                                                              | 54.9 (2288)               | 48.3 (1851)                 | 1.00                 |
| Eastern Canada (ON, QC)                                                                                                                                                                                                                                                                                                                                                                                                                                                                                                                                                                                                                                                                                                                                                                                                                                                                                                     | 33.7 (1404)               | 37.5 (1438)                 | 1.27 (1.15, 1.39)*** |
| Atlantic Canada (PEI, NS, NB, NFL)                                                                                                                                                                                                                                                                                                                                                                                                                                                                                                                                                                                                                                                                                                                                                                                                                                                                                          | 11.4 (474)                | 14.2 (546)                  | 1.42 (1.24, 1.63)*** |
| <b>Ethnicity</b>                                                                                                                                                                                                                                                                                                                                                                                                                                                                                                                                                                                                                                                                                                                                                                                                                                                                                                            |                           |                             |                      |
| White                                                                                                                                                                                                                                                                                                                                                                                                                                                                                                                                                                                                                                                                                                                                                                                                                                                                                                                       | 91.1 (3818)               | 91.3 (2937)                 | 1.00                 |
| Other                                                                                                                                                                                                                                                                                                                                                                                                                                                                                                                                                                                                                                                                                                                                                                                                                                                                                                                       | 8.1 (338)                 | 8.7 (281)                   | 1.08 (0.92, 1.28)    |
| <b>Education</b>                                                                                                                                                                                                                                                                                                                                                                                                                                                                                                                                                                                                                                                                                                                                                                                                                                                                                                            |                           |                             |                      |
| Some post-secondary or less                                                                                                                                                                                                                                                                                                                                                                                                                                                                                                                                                                                                                                                                                                                                                                                                                                                                                                 | 62.7 (2567)               | 64.9 (2081)                 | 1.00                 |
| University degree/ 4 years of college or higher                                                                                                                                                                                                                                                                                                                                                                                                                                                                                                                                                                                                                                                                                                                                                                                                                                                                             | 37.3 (1528)               | 35.1 (1126)                 | 0.91 (0.83, 1.00)    |
| <b>Years of Service</b>                                                                                                                                                                                                                                                                                                                                                                                                                                                                                                                                                                                                                                                                                                                                                                                                                                                                                                     |                           |                             |                      |
| Less than 4 years                                                                                                                                                                                                                                                                                                                                                                                                                                                                                                                                                                                                                                                                                                                                                                                                                                                                                                           | 4.6 (190)                 | 5.6 (183)                   | 1.00                 |
| 4-9 years                                                                                                                                                                                                                                                                                                                                                                                                                                                                                                                                                                                                                                                                                                                                                                                                                                                                                                                   | 17.3 (718)                | 19.7 (642)                  | 0.74 (0.60, 0.92)**  |
| 10-15 years                                                                                                                                                                                                                                                                                                                                                                                                                                                                                                                                                                                                                                                                                                                                                                                                                                                                                                                 | 23.4 (973)                | 24.8 (807)                  | 0.86 (0.69, 1.08)    |
| More than 15 years                                                                                                                                                                                                                                                                                                                                                                                                                                                                                                                                                                                                                                                                                                                                                                                                                                                                                                          | 54.8 (2,276)              | 49.8 (1,622)                | 0.74 (0.60, 0.92)    |
| <b>Public Safety Personnel Category</b>                                                                                                                                                                                                                                                                                                                                                                                                                                                                                                                                                                                                                                                                                                                                                                                                                                                                                     |                           |                             |                      |
| Municipal/provincial police                                                                                                                                                                                                                                                                                                                                                                                                                                                                                                                                                                                                                                                                                                                                                                                                                                                                                                 | 26.5 (1114)               | 24.3 (1052)                 | 1.00                 |
| RCMP                                                                                                                                                                                                                                                                                                                                                                                                                                                                                                                                                                                                                                                                                                                                                                                                                                                                                                                        | 25.2 (1059)               | 25.4 (1097)                 | 1.10 (0.97, 1.24)    |
| Correctional workers                                                                                                                                                                                                                                                                                                                                                                                                                                                                                                                                                                                                                                                                                                                                                                                                                                                                                                        | 14.1 (591)                | 16.6 (717)                  | 1.29 (1.12, 1.47)*** |
| Firefighters                                                                                                                                                                                                                                                                                                                                                                                                                                                                                                                                                                                                                                                                                                                                                                                                                                                                                                                | 15.4 (648)                | 14.6 (632)                  | 1.03 (0.99, 1.19)    |
| Paramedics                                                                                                                                                                                                                                                                                                                                                                                                                                                                                                                                                                                                                                                                                                                                                                                                                                                                                                                  | 13.6 (573)                | 13.7 (591)                  | 1.09 (0.95, 1.26)    |
| Call centre operators/dispatchers                                                                                                                                                                                                                                                                                                                                                                                                                                                                                                                                                                                                                                                                                                                                                                                                                                                                                           | 5.1 (214)                 | 5.4 (232)                   | 1.15 (0.94, 1.41)    |
| <p>Notes. *<math>p \leq .05</math>; **<math>p \leq .01</math>; ***<math>p \leq .001</math>.<br/>           An odds ratio of 1.00 indicates the reference group.<br/>           The 'Complete Data' category includes those who had responses for the public safety personnel variable, the sociodemographic variables, and one or more child maltreatment variables. The 'Incomplete Data' category includes all those who had a response on the public safety personnel type variable and the sociodemographic variables; but did not provide a response to any of the child maltreatment variables and therefore were not included in the final sample.</p> <p>Totals for each sociodemographic variable will not equal 8,520 due to missing data on each variable (i.e., responses on public safety personnel type and/or child maltreatment variables, but missing data on the specific sociodemographic variable).</p> |                           |                             |                      |
