# Supplementary material
Source: PubMed Central journal article supplement (PMC6201713)
Supplement: supp_6.4.E463_2017-0153-original_submission.pdf [file supp_6.4.E463_2017-0153-original_submission.pdf]

1 Child Abuse and Suicidal Behaviour in Canadian Public Safety Personnel

2  
3 **The Association Between Child Abuse and Suicidal Ideation, Plans, and Attempts in a Sample**  
4  
5  
6 **of Canadian Public Safety Personnel**  
7

8 Sarah Turner, MSc<sup>1</sup>, Tamara Taillieu PhD Cand.<sup>2</sup>, R. Nicholas Carleton, PhD<sup>3</sup>, Jitender Sareen,  
9  
10 MD<sup>4</sup>, Tracie O. Afifi, PhD<sup>1</sup>  
11

12  
13 <sup>1</sup> Departments of Community Health Sciences and Psychiatry, University of Manitoba,  
14  
15 Winnipeg, Manitoba, Canada  
16

17  
18 <sup>2</sup> Applied Health Sciences Program, University of Manitoba, Winnipeg, Manitoba, Canada  
19

20  
21 <sup>3</sup> Department of Psychology, University of Regina, Regina, Saskatchewan, Canada  
22

23  
24 <sup>4</sup> Department of Psychiatry, Psychology and Community Health Sciences, University of  
25  
26 Manitoba, Winnipeg, Manitoba, Canada  
27

28  
29  
30  
31  
32 Corresponding Author: Tracie O. Afifi, PhD, Department of Community Health Sciences,  
33  
34 University of Manitoba, S113-750 Bannatyne Ave, Winnipeg, MB R3E 0W5, Canada  
35  
36  
37 (tracie.afifi@umanitoba.ca).  
38  
39

40  
41  
42  
43  
44 Manuscript word count: 3,057  
45  
46  
47  
48  
49  
50  
51  
52  
53  
54  
55  
56  
57  
58  
59  
60

## Child Abuse and Suicidal Behaviour in Canadian Public Safety Personnel

## Abstract

*Background.* Experiences of child abuse have been identified as risk factors for adult suicidal behaviour in general population samples; however, this association has not been studied among Public Safety Personnel (PSP) in Canada. Information on how exposure to child abuse and career-related trauma (CRT) together are related to suicidal behaviour also remains unknown. The current study was designed to: 1) estimate the prevalence of child abuse histories among Canadian PSP; 2) examine the associations between child abuse histories and suicidal behaviour; 3) examine the associations between CRT and suicidal behaviour; and 4) examine the additive and interactive effects of child abuse and CRT on suicidal behaviour.

*Methods.* Data were drawn from a web-based, self-report survey collected by the Canadian Institute for Public Safety Research and included 4,199 PSP (police, firefighters, paramedics, correctional workers and dispatchers). Child abuse histories included physical abuse, sexual abuse, and exposure to intimate partner violence. Suicidal behavior included lifetime ideation, plans, and attempts. Logistic regression models were computed to examine the associations between child abuse histories and suicidal behaviours. Additive and interaction models were run to test the relationships between child abuse histories and CRT on suicidal behaviours.

*Results.* Among PSP, 55.9% experienced one or more types of child abuse. All types of child abuse were significantly associated with suicidal behaviour. CRT was significantly related to suicidal behaviour; however, larger associations existed for child abuse histories.

*Interpretation.* Identifying and understanding child abuse histories may be an important factor when providing treatment for PSP with suicidal behaviour.

## Child Abuse and Suicidal Behaviour in Canadian Public Safety Personnel

### Introduction

Public safety personnel (PSP) are front-line personnel who serve to protect Canadians by ensuring their safety and security.<sup>1</sup> PSP include those working as municipal, provincial or federal police (including RCMP), firefighters, paramedics, correctional workers, and call centre operators/dispatchers. PSP experience a substantial burden of mental health problems<sup>2</sup>, which are strongly associated with suicidal behaviour.<sup>3,4</sup> Recent estimates of suicidal behaviours from an online survey of Canadian PSP estimate that 27.8% report lifetime ideation, 13.3% report lifetime planning, and 4.6% report lifetime attempts.<sup>5</sup> These estimates are higher than representative reports from the Canadian general population, which indicate that 13.3%, 4.6%, and 3.5% experience suicidal ideation, planning, and attempts, respectively.<sup>6</sup> Suicide has been identified by the Canadian National Standing Committee of Public Safety and Security as an important issue among PSP that must be addressed, in part, with additional research on the risk factors for suicidal behaviours to inform effective prevention strategies.<sup>1</sup>

As a function of their profession, PSP are frequently exposed to traumatic and severe events, such as being shot at, responding to a serious accident or injury, or being exposed to death and dying, which may contribute to poor mental health and suicidal behaviours.<sup>7-9</sup> Violanti et al. 2004 reported that exposure to the homicide of a fellow officer, persons dying, or other disturbing incidents, were significantly associated with high trauma scores in a sample of police officers from the United States (US). High trauma scores were also significantly related to increased odds of suicidal ideation in this population.<sup>10</sup> In the military population, a population that is similar to PSP with respect to career-related trauma (CRT) exposure, combat related experiences, such as exposure to death and/or killing, are significantly associated with suicide-

## Child Abuse and Suicidal Behaviour in Canadian Public Safety Personnel

1  
2  
3 related outcomes.<sup>11-14</sup> However, evidence from military samples as well as a sample of women  
4  
5 firefighters, show that CRT exposure does not entirely account for the increased prevalence of  
6  
7 suicidal behaviours in these occupations: elevated suicidal outcomes were seen among US  
8  
9 soldiers who did not deploy<sup>15</sup> and pre-career suicidality was elevated among women  
10  
11 firefighters in the US.<sup>16</sup> Furthermore, in a Canadian military sample, the relationship between  
12  
13 deployment-related trauma and suicidality was significantly attenuated after adjusting for child  
14  
15 abuse history, showing the importance of pre-career traumas on adult suicidal behaviour.<sup>14</sup> It is  
16  
17 unclear how factors other than CRT are associated with suicidal behaviour among Canadian  
18  
19 PSP, which compromises our understanding of the potential implications these associations  
20  
21 may have for suicide prevention.  
22  
23  
24  
25  
26

27  
28 Pre-career traumas such as childhood abuse have been linked to an increased risk of  
29  
30 adult mental disorders as well as suicidality.<sup>17-23</sup> The prevalence of childhood abuse in the  
31  
32 Canadian general population is approximately 32%<sup>17</sup>, indicating that almost one third of  
33  
34 Canadian adults have experienced physical abuse, sexual abuse, and/or exposure to intimate  
35  
36 partner violence (IPV) prior to the age of 16. In Canadian military populations, this prevalence  
37  
38 is higher, with 48% of the Regular Force personnel experiencing any child abuse including  
39  
40 physical abuse, sexual abuse, or exposure to IPV.<sup>18</sup> In a sample of US police and firefighters who  
41  
42 responded to the Hurricane Katrina disaster, 18.8% experienced childhood physical  
43  
44 victimization (i.e. being attacked, injured, pushed, beaten or spanked before at 18 years old)<sup>24</sup>,  
45  
46 a prevalence that is similar to the US general population average for physical abuse (17.6%).<sup>25</sup>  
47  
48  
49  
50 However, direct comparisons among these US populations cannot be made due to differences  
51  
52 in item measurement. The prevalence of childhood abuse among Canadian PSP is unknown.  
53  
54  
55  
56  
57  
58  
59  
60

## Child Abuse and Suicidal Behaviour in Canadian Public Safety Personnel

Individuals commonly experience more than one traumatic event in their lifetime<sup>26</sup> and cumulative trauma exposure can increase an individual's risk for mental disorders and suicidality.<sup>27,28</sup> Among police and firefighters responding to the Hurricane Katrina disaster, those who had experienced childhood physical victimization were more likely to have higher prevalence of multiple negative mental health outcomes, including higher symptoms of posttraumatic stress disorder and prevalence of insomnia compared to those who did not experience childhood physical victimization.<sup>24</sup> Only one study to our knowledge has examined the additive effects of childhood abuse and CRT on suicidality.<sup>18</sup> In the Canadian military, those who experienced child abuse had greater odds of suicidal ideation, plans, and attempts compared to those who had not experienced child abuse; and additive models indicated that experiencing both child abuse and CRT was more strongly related to suicidal outcomes than the experience of either type of trauma alone.<sup>18</sup> PSP experience different training (i.e. law enforcement vs. combat) and work environments (i.e. trauma exposure occurs in their home communities vs. while on deployment) compared to military personnel and therefore this is an important population to study independently. This study will use a large sample of Canadian PSP to better understand risk factors for developing suicidal behaviours during PSP careers, therein informing suicide prevention strategies. The objectives of the current study are to: 1) estimate the prevalence of child abuse exposure among Canadian PSP; 2) examine the associations between child abuse exposure and suicidal ideation, plans, and attempts; 3) examine the associations between CRT and suicidal ideation, plans, and attempts; and 4) compute the additive and interactive effects of child abuse and CRT on suicidal behaviour.

## Child Abuse and Suicidal Behaviour in Canadian Public Safety Personnel

### Methods

#### *Data and Sample*

Data were drawn from a web-based survey of PSP in Canada available online from September 1, 2016 to January 31, 2017.<sup>2,5</sup> The survey modules were developed by the Canadian Institute for Public Safety Research and Treatment (CIPSRT), which included representatives from the Canadian Association of Chiefs of Police (CACP), the Canadian Association of Fire Chiefs (CAFC), the Canadian Association for Police Governance (CAPG), the Canadian Police Association (CPA), Correctional Service of Canada (CSC), the International Association of Firefighters (IAFF), the Paramedic Association of Canada (PAC), the Paramedic Chiefs of Canada (PCC), the Royal Canadian Mounted Police (RCMP), and the Union of Solicitor General Employees (USGE). The study was approved by the University of Regina Research Ethics Board (File #2016-107). Participation in the survey was solicited through emails that were sent to currently serving Canadian PSP lists, as well as through public service announcements from provincial and municipal PSP agencies. The survey link was also made available through social media and websites; accordingly, the total number of PSP that were invited to the survey is unknown. A total of 8,520 respondents began the survey, however, only 4,340 progressed far enough to complete the child abuse, career trauma, and suicide modules in this survey. Analyses were restricted to those who worked as municipal or provincial police, Royal Canadian Mounted Police (RCMP), paramedics, firefighters, correctional workers and call centre operators/dispatchers; therefore, resulting in a final sample of N= 4,199 (49.3% of the initial sample).

## Child Abuse and Suicidal Behaviour in Canadian Public Safety Personnel

### *Child Abuse*

Child abuse was measured using six questions that have previously been validated and used in nationally representative Canadian surveys.<sup>29,30</sup> All questions were measured on an ordinal scale with response options *never*, *1-2 times*, *3-5 times*, *6-10 times*, or *>10 times*. There were three questions used to measure child physical abuse: 1) “How many times did an adult slap you on the face, hand or ears or hit or spank you with something hard to hurt you?”, 2) “How many times did an adult push, grab, shove, or throw something at you to hurt you?”, and 3) “How many times did an adult kick, bite, punch, shove, burn you or physically attack you in some way?”. A response option of 3 or more times for questions 1 and 2, and any response other than *never* for question 3, were coded as physical abuse. Any physical abuse was coded as exposure to at least one of these three experiences based on the above coding. Sexual abuse was measured using the following items: “How many times did an adult force you or attempt to force you into any unwanted sexual activity by threatening you, holding you down or hurting you in some way?” and “How many times did an adult touch you against your will in any sexual way? By this, we mean anything from unwanted touching, or grabbing, to kissing or fondling”. Exposure to sexual abuse was coded as any response other than *never* on either question. Exposure to IPV was measured using one item: “How many times did you see or hear any one of your parents, step-parents or guardians hit each other or another adult in the home? By adult, we mean anyone 18 years and over”. A response option of 3 times or more question was coded as EIPV. Additionally, a dichotomous measure of any child abuse was computed that coded respondents who experienced one or more types of abuse into the *yes* category. Number of child abuse exposures was coded as *none*, *1 type* or *2 or more types*.

## Child Abuse and Suicidal Behaviour in Canadian Public Safety Personnel

### *Career-Related Trauma*

PSP were asked to indicate all severe and potentially traumatic events that they witnessed or experienced from the following list: 1) line of duty deaths, 2) serious line of duty injuries, 3) disaster or multiple causality incidents, 4) incidents involving the unusual or sudden death of children or harm of children, 5) events that threatened their life or the life of a colleague, 6) incidents where victims were relatives or friends, 7) suicide of a close colleague or superior. A dichotomous variable was created that classified PSP who experienced one or more of these events into the *yes* category.<sup>31</sup>

### *Suicidal Behaviours*

Questions assessing suicidal ideation, plans, and attempts were asked to all PSP. Each respondent was asked if they ever: 1) seriously contemplated suicide; 2) made a plan to attempt suicide; or 3) attempted suicide in their lifetime.<sup>30,32,33</sup>

### *Sociodemographic Variables*

Sociodemographic covariates included: sex, age (continuous), marital status (married/common-law/remarried; single; separated/divorced/widowed), provincial region of residence (Western Canada and the Territories; Eastern Canada; Atlantic Canada), ethnicity (white; other), education (some post-secondary; university degree/4 years of college or higher), years of service as a PSP (continuous), and PSP professional category (municipal/provincial police; RCMP; correctional workers; firefighter; paramedic; and call centre operators/dispatchers).

### *Statistical Analysis*



## Child Abuse and Suicidal Behaviour in Canadian Public Safety Personnel

1  
2  
3  
4  
5  
6  
7  
8  
9  
10  
11  
12  
13  
14  
15  
16  
17  
18  
19  
20  
21  
22  
23  
24  
25  
26  
27  
28  
29  
30  
31  
32  
33  
34  
35  
36  
37  
38  
39  
40  
41  
42  
43  
44  
45  
46  
47  
48  
49  
50  
51  
52  
53  
54  
55  
56  
57  
58  
59  
60

Cross tabulations and logistic regression were used to determine the sociodemographic characteristics of the sample stratified by any child abuse exposure. The frequency of each child abuse type by PSP category was calculated with cross tabs. Significant differences between PSP categories were tested by changing the reference group in logistic regression models. Logistic regression models were computed to examine the relationships between child abuse types and lifetime suicidal ideation, plans, and attempts, adjusting for SES covariates. Additive effects were tested by creating a multilevel variable of mutually exclusive categories that included those who did not experience child abuse or CRT, experienced child abuse only, experienced CRT only, or experienced both child abuse and CRT. Differences between the additive model categories were tested using logistic regression and changing the reference group. An interaction term between any child abuse and any CRT was computed and entered into the logistic regression models to test for interaction effects. All additive and interactive logistic regression models were adjusted for SES covariates.

### Results

Table 1 describes the sociodemographic characteristics of the sample stratified by experiences of child abuse. Several variables were related to increased odds of having experienced child abuse including: increased age, being separated/widowed/divorced, ethnicity other than White, and greater years of service (Odds Ratios [OR] ranged from 1.02 to 1.60). Participants living in Atlantic Canada compared to Western Canada/Territories, or having a university degree or four years of college compared to less education, had lower odds of having a child abuse history (OR= 0.72 and 0.78, respectively). Regarding PSP category, correctional

## Child Abuse and Suicidal Behaviour in Canadian Public Safety Personnel

workers and paramedics compared to municipal/provincial police had greater odds of having a child abuse history (OR = 1.23 and 1.27, respectively).

Table 2 provides the prevalence of child abuse history by PSP category. Most PSP (55.9%) in the current sample reported having a child abuse history; specifically, 49.4% reported physical abuse, 14.1% reported sexual abuse, and 8.9% reported exposure to IPV. Significant differences between PSP categories were noted for all types of child abuse history; however, consistent trends only appeared for correctional workers and call centre operators/dispatchers. Compared to all other PSP categories, correctional workers and call centre operators/dispatchers were more likely to experience being pushed, grabbed, shoved, or having something thrown at them, sexual abuse, and two or more types of child abuse.

Table 3 describes the relationship between child abuse types and lifetime suicidal ideation, plans, and attempts. All types of child abuse history were related to lifetime suicidal ideation (adjusted OR [AOR] range from 2.09 to 2.63), plans (AOR range from 2.06 to 2.48), and attempts (AOR range from 2.38 to 3.25).

Additive models in Table 4 report significant associations between experiencing child abuse only, CRT only or both child abuse and CRT and suicidal behaviours (AOR range from 1.84 to 7.12). As indicated by superscripts, exposure child abuse only and exposure to both CRT and child abuse did not have statistically different associations with suicidal behaviour. However, the associations between CRT only and suicidal behaviour were significantly smaller than exposure to child abuse only, or both child abuse and CRT. Table 5 describes the individual and interaction effects of CRT and child abuse history on suicidal behaviours. CRT was significantly related to lifetime suicidal ideation, plans, and attempts (AOR 1.57, 1.78, and 1.22,

## Child Abuse and Suicidal Behaviour in Canadian Public Safety Personnel

1  
2  
3 respectively). Interaction terms between CRT and child abuse history on lifetime suicidal  
4  
5 ideation, plans, and attempts were not significant. After controlling for CRT, child abuse history  
6  
7 remained significantly related to lifetime suicidal behaviours (AOR range from 2.21 to 2.60).  
8  
9  
10 After controlling for child abuse history, CRT was no longer significantly related to suicidal  
11  
12 behaviours.  
13  
14  
15  
16  
17

## 18 Discussion

19  
20 The current study has four novel findings. First, 55.9% of PSP in the sample have  
21  
22 experienced child abuse. Second, correctional workers and call centre operators/ dispatchers  
23  
24 often had a higher prevalence of child abuse exposure compared to all other PSP categories.  
25  
26 Third, all types of child abuse histories among PSP were significantly related to lifetime suicidal  
27  
28 behaviour. Fourth, CRT was significantly related to suicidal behaviour; however, there were  
29  
30 stronger associations between those with child abuse history only or exposure to both child  
31  
32 abuse and CRT and suicidal outcomes compared to those who only experienced CRT.  
33  
34  
35  
36

37 Over half of the current PSP sample reported having experienced some form of child  
38  
39 abuse before the age of 16 years. The current results are higher than estimates from the  
40  
41 Canadian general population (32%)<sup>17</sup> and higher, but more similar to the Canadian military  
42  
43 population (48%).<sup>18</sup> Notably, the same child abuse measures were used to compute the  
44  
45 prevalence in all three Canadian samples. Similar estimates are not available for PSP samples  
46  
47 from Canada or other countries. The current study provides the first national estimates of  
48  
49 exposure to childhood physical and sexual abuse and exposure to IPV among PSP. Correctional  
50  
51 workers and call centre operators/dispatchers reported a higher prevalence of exposure to  
52  
53  
54  
55  
56  
57  
58  
59  
60

## Child Abuse and Suicidal Behaviour in Canadian Public Safety Personnel

1  
2  
3 some types of child abuse compared to other PSP. We are unable to explain the differences in  
4  
5 exposure prevalence; however, these PSP careers may be associated with increased self-  
6  
7 selection among persons who experienced child abuse. Future research should seek to replicate  
8  
9 and understand the underlying mechanisms associated with such differences. In the interim,  
10  
11 the high prevalence of child abuse history among all PSP should be recognized and  
12  
13 comprehensive initiatives promoting trauma-informed care should be supported.  
14  
15  
16  
17

18 Consistent with other studies, the current results present strong evidence for the  
19  
20 association between child abuse histories and suicidal ideation, plans, and attempts in  
21  
22 adulthood. Other studies have found comparable results in military populations<sup>18,34</sup>, which is a  
23  
24 similar population to PSP with respect to high CRT, and in general population samples.<sup>17,19,23</sup>  
25  
26 The high prevalence of child abuse exposure in the PSP population, coupled with the strong  
27  
28 association with suicidal behaviour, provides further evidence for the importance of child abuse  
29  
30 prevention and recognition of child abuse histories as important indicators of suicidal  
31  
32 behaviour.  
33  
34  
35  
36

37 CRT was also significantly associated with suicidal ideation, plans, and attempts. The  
38  
39 results are consistent with data from PSP samples from the US indicating that exposure to  
40  
41 traumatic events, such as responding a suicide attempt or death,<sup>35</sup> traumatic work-related  
42  
43 events,<sup>36</sup> or death of a fellow officer<sup>10</sup>, were related to increased suicidal behaviour. Significant  
44  
45 associations between child abuse history and suicidal behaviours remained after adjusting for  
46  
47 CRT; however, significant associations between CRT and suicidal behaviour did not remain after  
48  
49 adjusting for child abuse history. This indicates that a significant portion of the association  
50  
51 between CRT and suicidal behaviours can be accounted for by child abuse histories. Additive  
52  
53  
54  
55  
56  
57  
58  
59  
60

## Child Abuse and Suicidal Behaviour in Canadian Public Safety Personnel

1  
2  
3 models described that exposure to both child abuse and CRT result in the largest odds of  
4  
5 suicidal behaviour; however, these relationships were not significantly different from the  
6  
7 relationships between child abuse only and suicidal behaviour. These results indicate that the  
8  
9 addition of exposure to CRT does not significantly increase the strength of the association  
10  
11 between child abuse history and suicidal behaviour. This provides evidence for the importance  
12  
13 of recognizing child abuse history as an indicator of suicidal behaviour, over and above  
14  
15 exposure to CRT. Other studies using military data have found similar associations, whereby  
16  
17 child abuse histories were more strongly related to suicidal behaviour than CRT.<sup>18,37</sup>  
18  
19  
20  
21  
22

23 The current study has several limitations that must be taken into consideration. First,  
24  
25 the current data are cross sectional, prohibiting causal inferences. Second, participation in the  
26  
27 current survey was voluntary, self-selected, and completed online; therefore, self-selection  
28  
29 response bias may be present and the current data may not be representative of the entire PSP  
30  
31 population in Canada. Third, comparability of the current data to other nationally  
32  
33 representative Canadian general population or military datasets may not be possible due to  
34  
35 differences in data collection methods. The current data are strengthened by including a large  
36  
37 sample of diverse PSP in the same sampling frame to present a comprehensive picture of the  
38  
39 relationships between child abuse history, CRT and suicide in Canada and to facilitate  
40  
41 comparisons among multiple PSP roles.  
42  
43  
44  
45  
46  
47  
48  
49

## 50 Conclusion

51  
52 The high prevalence of child abuse histories among a large Canadian PSP sample signals  
53  
54 the need for stronger child abuse prevention strategies and positive parenting interventions.  
55  
56  
57  
58  
59  
60

## Child Abuse and Suicidal Behaviour in Canadian Public Safety Personnel

1  
2  
3 Child abuse is associated with adult suicidal behaviours; accordingly, reducing child abuse may  
4  
5 also reduce suicidal ideation, plans, and attempts among Canadian PSP. Both CRT and child  
6  
7 abuse histories are significant factors associated with suicidality. After adjusting for the CRT,  
8  
9 child abuse histories were significantly related to suicidal behaviour; however, CRT was not  
10  
11 significantly related to suicidal behaviours after adjusting for child abuse histories. The  
12  
13 knowledge of child abuse histories is important for developing effective treatment and  
14  
15 intervention strategies aimed at reducing suicide among PSP.  
16  
17  
18  
19  
20  
21

### Acknowledgements

22  
23  
24  
25 Special thanks for recruitment support provided by the (alphabetically): Badge of Life  
26  
27 Canada, Behind the Red Serge, Canadian Association for Police Governance (CAPG), Canadian  
28  
29 Association of Chiefs of Police (CACP), Canadian Association of Fire Chiefs (CAFC), Canadian  
30  
31 Institute for Military and Veteran Health Research (CIMVHR), Canadian Ministry of Public Safety  
32  
33 and Emergency Preparedness, Canadian Police Association (CPA), Community Safety Knowledge  
34  
35 Alliance, Correctional Service of Canada (CSC), Families of the RCMP for PTSD Awareness, First  
36  
37 Responder Mental Health Network Collaboration, International Association of Firefighters  
38  
39 (IAFF), Justice Institute of British Columbia, Mental Health Commission of Canada, Mood  
40  
41 Disorders Society of Canada, Nova Scotia Operational Stress Injury Clinic - Capital Health,  
42  
43 Paramedic Association of Canada (PAC), Paramedic Chiefs of Canada (PCC), Royal Canadian  
44  
45 Mounted Police (RCMP), Tema Conter Trust, Union of Solicitor General Employees (USGE), and  
46  
47 Wounded Warriors Canada. This research was funded in part by the Ministry of Public Safety  
48  
49 and Emergency Preparedness through the Policy Development Contribution Program.  
50  
51  
52  
53  
54  
55  
56  
57  
58  
59  
60

Child Abuse and Suicidal Behaviour in Canadian Public Safety Personnel

Funding

Tracie O. Afifi's research is supported by a CIHR New Investigator Award and Foundation Scheme Award. R. Nicholas Carleton's research is supported by the Canadian Institutes of Health Research (CIHR) through a New Investigator Award (FRN: 13666). This research was funded in part by the Ministry of Public Safety and Emergency Preparedness through the Policy Development Contribution Program.

Confidential

## Child Abuse and Suicidal Behaviour in Canadian Public Safety Personnel

## References

1. Oliphant R. Healthy minds, safe communities: Supporting our public safety officers through a national strategy for operational stress injuries: Report of the Standing Committee on Public Safety and National Security. House of Commons. 2016.
2. Carleton RN, Afifi TO, Turner S, Taillieu T, Duranceau S, LeBouthillier DM, et al. Mental disorder symptoms among public safety personnel in Canada. *Can J Psychiatry*. 2017. In Press.
3. Violanti JM, Fekedulegn D, Charles LE, Andrew ME, Hartley TA, Mnatsakanova A, et al. Suicide in police work: Exploring potential contributing influences. *Am J Crim Justice*. 2009;34(1–2):41–53.
4. Nock MK, Hwang I, Sampson N, Kessler RC, Angermeyer M, Beautrais A, et al. Cross-national analysis of the associations among mental disorders and suicidal behavior: Findings from the WHO World Mental Health Surveys. *PLoS One*. 2009;6(8).
5. Carleton RN, Afifi TO, Turner S, Taillieu TL, LeBouthillier DM, Duranceau S, et al. Suicidal Ideation, Plans, and Attempts Among Public Safety Personnel in Canada. *Under Review*. 2017.
6. Sareen J, Afifi TO, Taillieu T, Ma KC, Bhsc ST, Bolton S, et al. Trends in suicidal behavior and use of mental health services in Canadian military and civilian populations. *CMAJ*. 2016;188(11):1–7.
7. Komarovskaya I, Maguen S, McCaslin SE, Metzler TJ, Madan A, Brown AD, et al. The impact of killing and injuring others on mental health symptoms among police officers. *J*



## Child Abuse and Suicidal Behaviour in Canadian Public Safety Personnel

- 1  
2  
3       *Psychiatr Res.* 2011;45(10):1332–6.  
4  
5  
6 8. Stanley IH, Hom MA, Joiner TE. A systematic review of suicidal thoughts and behaviors  
7  
8 among police officers, firefighters, EMTs, and paramedics. *Clin Psychol Rev.* 2016;44:25–  
9  
10 44.  
11  
12  
13 9. Weiss D, Brunet A, Best S, Metzler T, Liberman A, Pole N, et al. Frequency and severity  
14  
15 approaches to indexing exposure to trauma: The Critical Incident History Questionnaire  
16  
17 for police officers. *J Trauma Stress.* 2010;23(6):734–43.  
18  
19  
20 10. Violanti JM. Predictors of Police Suicide Ideation. *Suicide Life-Threatening Behav.*  
21  
22 2004;34(3).  
23  
24  
25 11. Bryan CJ, Griffith JE, Pace BT, Hinkson K, Bryan AO, Clemans TA, et al. Combat exposure  
26  
27 and risk for suicidal thoughts and behaviors among military personnel and veterans: A  
28  
29 systematic review and meta-analysis. *Suicide Life-Threatening Behav.* 2015;45(5):633–49.  
30  
31  
32 12. Sareen J, Cox BJ, Afifi TO, Stein MB, Belik SL, Meadows G AG. Combat and peacekeeping  
33  
34 operations in relation to prevalence of mental disorders and perceived need for mental  
35  
36 health care. *Arch Gen Psychiatry.* 2007;64(7):843–52.  
37  
38  
39  
40 13. Boulos D, Zamorski MA. Deployment-related mental disorders among Canadian Forces  
41  
42 personnel deployed in support of the mission in Afghanistan, 2001-2008. *CMAJ.*  
43  
44 2013;185(11):2001–8.  
45  
46  
47 14. Sareen J, Afifi TO, Taillieu T, Cheung K, Turner S, Stein MB, et al. Deployment-related  
48  
49 traumatic events and suicidal behaviours in a nationally representative sample of  
50  
51 Canadian Armed Forces Personnel. *Can J Psychiatry.* 2017; 62 (11): 795-804  
52  
53  
54 15. Schoenbaum M, Kessler RC, Gilman SE, Colpe LJ, Heeringa SG, Stein MB, et al. Predictors  
55  
56  
57  
58  
59  
60

## Child Abuse and Suicidal Behaviour in Canadian Public Safety Personnel

- 1  
2  
3 of suicide and accident death in the Army Study to Assess Risk and Resilience in  
4  
5 Servicemembers (Army STARRS). *JAMA Psychiatry*. 2014;71(5):493.  
6  
7
- 8 16. Stanley IH, Hom MA, Spencer-Thomas S, Joiner TE. Suicidal thoughts and behaviors  
9  
10 among women firefighters: An examination of associated features and comparison of  
11  
12 pre-career and career prevalence rates. *J Affect Disord*. 2017;221:107–14.  
13  
14
- 15 17. Afifi TO, MacMillan HL, Boyle M, Taillieu T, Cheung K, Sareen J. Child abuse and mental  
16  
17 disorders in Canada. *CMAJ*. 2014;186(9):E324–32.  
18  
19
- 20 18. Afifi TO, Taillieu T, Zamorski MA, Turner S, Cheung K, Sareen J. Association of child abuse  
21  
22 exposure with suicidal ideation, suicide plans, and suicide attempts in military personnel  
23  
24 and the general population in Canada. *JAMA Psychiatry*. 2016;73(3):229.  
25  
26
- 27 19. Scott KM, Smith DR, Ellis PM. Prospectively ascertained child maltreatment and its  
28  
29 association with DSM-IV mental disorders in young adults. *Arch Gen Psychiatry*.  
30  
31 2010;67(7):712–9.  
32  
33
- 34 20. Borges G, Nock MK, Haro Abad JM, Hwang I, Sampson NA, Alonso J, et al. Twelve-month  
35  
36 prevalence of and risk factors for suicide attempts in the World Health Organization  
37  
38 World Mental Health Surveys. *J Clin Psychiatry*. 2010;71(12):1617–28.  
39  
40
- 41 21. Dube SR, Anda RF, Felitti VJ, Chapman DP, Williamson DF, Giles WH, et al. Childhood  
42  
43 abuse, household dysfunction, and the risk of attempted suicide throughout the life  
44  
45 span. *JAMA*. 2001;286(24):3089.  
46  
47
- 48 22. McLaughlin KA, Green JG, Gruber MJ, Sampson NA, Zaslavsky AM, Kessler RC. Childhood  
49  
50 adversities and adult psychiatric disorders in the national comorbidity survey replication  
51  
52 II: Associations with persistence of DSM-IV disorders. *Arch Gen Psychiatry*.  
53  
54  
55  
56  
57  
58  
59  
60

## Child Abuse and Suicidal Behaviour in Canadian Public Safety Personnel

- 2010;67(2):124–32.
23. Kessler RC, McLaughlin KA, Green JG, Gruber MJ, Sampson NA, Zaslavsky AM, et al. Childhood adversities and adult psychopathology in the WHO World Mental Health Surveys. *Br J Psychiatry*. 2010;197(5):378–85.
24. Komarovskaya I, Brown AD, Galatzer-Levy IR, Madan A, Henn-Haase C, Teater J, et al. Early physical victimization is a risk factor for posttraumatic stress disorder symptoms among Mississippi police and firefighter first responders to Hurricane Katrina. *Psychol Trauma Theory, Res Pract Policy*. 2014;6(1):92–6.
25. Afifi TO, Mather A, Boman J, Fleisher W, Enns MW, Macmillan H, et al. Childhood adversity and personality disorders: Results from a nationally representative population-based study. *J Psychiatr Res*. 2011;45(6):814–22.
26. Ogle CM, Rubin DC, Berntsen D, Siegler IC. The frequency and impact of exposure to potentially traumatic events over the life course. *Clin Psychol Sci*. 2013;1(4):426–34.
27. Turner RJ, Lloyd DA. Lifetime Traumas and Mental Health: The significance of cumulative adversity. *J Health Soc Behav*. 1995;36(4):360.
28. Stein DJ, Chiu WT, Hwang I, Kessler RC, Sampson N, Alonso J, et al. Cross-national analysis of the associations between traumatic events and suicidal behavior: Findings from the WHO World Mental Health Surveys. *PLoS One*. 2010;5(5).
29. Walsh CA, MacMillan HL, Trocmé N, Jamieson E, Boyle MH. Measurement of victimization in adolescence: Development and validation of the Childhood Experiences of Violence Questionnaire. *Child Abuse Negl*. 2008;32(11):1037–57.
30. Statistics Canada. Canadian Community Health Survey (CCHS)- Mental Health User Guide.

## Child Abuse and Suicidal Behaviour in Canadian Public Safety Personnel

- 2013.
31. Brown JJ, Freeman C., Flynn B, Sherman R. Integration in the Emergency Operations Centre (EOC)/ Emergency Communications Centre (ECC). In: Flynn B, Sherman R, editors. Integrating Emergency Management and Disaster Behavioral Health: One Picture through Two Lenses. Elsevier Inc.; 2017. p. 255–76.
  32. Statistics Canada. Canadian Community Health Survey (CCHS)- Mental Health Questionnaire- November 30, 2011. Ottawa (ON); 2011.  
<http://www23.statcan.gc.ca/imdb/p2SV.pl?Function=getSurvey&Id=5285>
  33. Statistics Canada. Canadian Forces Mental Health Survey Questionnaire. 2013.  
<http://www23.statcan.gc.ca/imdb/p2SV.pl?Function=getSurvey&SDDS=5084>
  34. Stein M, Campbell-Sills L, Ursano R, Rosellini A, Colpe L, He F, et al. Childhood maltreatment and lifetime suicidal behaviours among new soldiers in the US army: Results from the army study to assess risk and resilience in servicemembers (Army STARRS). *J Clin Psychiatry*. 2017. In Press.
  35. Stanley IH, Hom MA, Hagan CR, Joiner TE. Career prevalence and correlates of suicidal thoughts and behaviors among firefighters. *J Affect Disord*. 2015;187:163–71.
  36. Chopko BA, Palmieri PA, Facemire VC. Prevalence and predictors of suicidal ideation among U.S. law enforcement officers. *J Police Crim Psychol*. 2014;29:1–9.
  37. Belik S-L, Stein MB, Asmundson GJ, Sareen J. Relation between traumatic events and suicide attempts in Canadian military personnel. *Can J Psychiatry*. 2009;54(2):93–104.

## Child Abuse and Suicidal Behaviour in Canadian Public Safety Personnel

**Table 1: Sociodemographic Variables by Child Abuse in a Sample of Canadian Public Safety Personnel (n= 4199)**

| Variable                                                       | No Child Abuse % (n) | Child Abuse % (n) | OR (95% CI)           |
|----------------------------------------------------------------|----------------------|-------------------|-----------------------|
| <b>Sex</b>                                                     |                      |                   |                       |
| Male                                                           | 45.1 (1222)          | 54.9 (1490)       | 1.00                  |
| Female                                                         | 42.3 (570)           | 57.7 (778)        | 1.12 (0.98, 1.3)      |
| <b>Age (Mean (SD))</b>                                         | 41.7 (9.3)           | 44.5 (8.9)        | 1.04 (1.03, 1.04) *** |
| <b>Marital Status</b>                                          |                      |                   |                       |
| Married/ Common-law/ Re-married                                | 45.5 (1453)          | 54.4 (1741)       | 1.00                  |
| Single                                                         | 44.1 (181)           | 55.9 (229)        | 1.06 (0.9, 1.3)       |
| Separated/ Divorced/ Widowed                                   | 34.2 (151)           | 65.8 (290)        | 1.60 (1.3, 2.0)***    |
| <b>Provincial Region</b>                                       |                      |                   |                       |
| Western Canada (BC, AB, SK, MB) and Territories (YK, NWT, NVT) | 43.5 (962)           | 56.5 (1249)       | 1.00                  |
| Eastern Canada (ON, QC)                                        | 42.4 (580)           | 57.6 (787)        | 1.05 (0.9, 1.2)       |
| Atlantic Canada (PEI, NS, NB, NFL)                             | 51.6 (239)           | 48.4 (224)        | 0.72 (0.6, 0.9)***    |
| <b>Ethnicity</b>                                               |                      |                   |                       |
| White                                                          | 45.0 (1671)          | 55.0 (2039)       | 1.00                  |
| Other                                                          | 34.6 (112)           | 65.4 (212)        | 1.55 (1.2, 2.0)***    |
| <b>Education</b>                                               |                      |                   |                       |
| Some post-secondary or less                                    | 41.8 (1038)          | 58.2 (1444)       | 1.00                  |
| University degree/ 4 years of college or higher                | 48.0 (714)           | 52.0 (774)        | 0.78 (0.7, 0.9)***    |
| <b>Years of Service (Mean (SD))</b>                            | 16.6 (9.4)           | 18.6 (9.3)        | 1.02 (1.02, 1.03) *** |
| <b>Public Safety Personnel Category</b>                        |                      |                   |                       |
| Municipal/provincial police                                    | 45.6 (497)           | 54.4 (594)        | 1.00                  |
| RCMP                                                           | 46.7 (480)           | 53.3 (547)        | 0.95 (0.8, 1.1)       |

Child Abuse and Suicidal Behaviour in Canadian Public Safety Personnel

|                                   |            |            |                  |
|-----------------------------------|------------|------------|------------------|
| Correctional workers              | 40.6 (234) | 59.4 (343) | 1.23 (1.0, 1.5)* |
| Firefighters                      | 45.1 (279) | 54.9 (340) | 1.02 (0.8, 1.2)  |
| Paramedics                        | 39.6 (218) | 60.4 (332) | 1.27 (1.0, 1.6)* |
| Call centre operators/dispatchers | 43.1 (90)  | 56.9 (119) | 1.11 (0.8, 1.5)  |

Notes. \* $p \leq .05$ ; \*\* $p \leq .01$ ; \*\*\* $p \leq .001$ .

Confidential

1  
2  
3  
4  
5  
6  
7  
8  
9  
10  
11  
12  
13  
14  
15  
16  
17  
18  
19  
20  
21  
22  
23  
24  
25  
26  
27  
28  
29  
30  
31  
32  
33  
34  
35  
36  
37  
38  
39  
40  
41  
42  
43  
44  
45  
46  
47

## Child Abuse and Suicidal Behaviour in Canadian Public Safety Personnel

**Table 2: Prevalence of Child Abuse by Public Safety Personnel Category**

|                                                                                  | Total % (n)     | Municipal/<br>Provincial<br>Police %<br>(n) <sup>a</sup> | RCMP<br>% (n) <sup>b</sup> | Correctional<br>Workers<br>% (n) <sup>c</sup> | Firefighter<br>% (n) <sup>d</sup> | Paramedic<br>% (n) <sup>e</sup> | Call Centre<br>Operators/<br>Dispatchers<br>% (n) <sup>f</sup> | Significant<br>Differences<br>Between PSP<br>Types |
|----------------------------------------------------------------------------------|-----------------|----------------------------------------------------------|----------------------------|-----------------------------------------------|-----------------------------------|---------------------------------|----------------------------------------------------------------|----------------------------------------------------|
| Slapped on the face,<br>head or ears or hit<br>or spanked with<br>something hard | 46.0%<br>(1880) | 44.2% (482)                                              | 42.6% (440)                | 48.5% (280)                                   | 48.9% (305)                       | 50.0% (278)                     | 45.5% (95)                                                     | a<e<br>b<c, d, e                                   |
| Pushed, grabbed,<br>shoved, or<br>something thrown<br>at                         | 20.4% (831)     | 18.9% (205)                                              | 19.3% (198)                | 25.0% (144)                                   | 19.4% (121)                       | 18.7% (104)                     | 28.8% (59)                                                     | a<c, f<br>b<c, f<br>d<c, f<br>e<c, f               |
| Kicked, bit,<br>punched, choked,<br>burned or attacked                           | 13.2% (546)     | 11.5% (127)                                              | 11.8% (124)                | 15.7% (91)                                    | 13.3% (85)                        | 15.2% (86)                      | 15.4% (33)                                                     | a<c, e<br>b<c                                      |
| Any Physical Abuse                                                               | 49.4%<br>(2018) | 47.9% (523)                                              | 46.3% (477)                | 51.2% (296)                                   | 52.4% (326)                       | 53.2% (295)                     | 48.6% (101)                                                    | a<e<br>b<d, e                                      |
| Sexual Abuse                                                                     | 14.1% (583)     | 12.7% (139)                                              | 12.3% (129)                | 22.8% (132)                                   | 7.4% (47)                         | 15.2% (86)                      | 23.8% (50)                                                     | a<c, f<br>b<c, f<br>d<a, b, c, e, f<br>e<f, c      |
| Exposure to IPV                                                                  | 8.9% (368)      | 8.5% (94)                                                | 9.0% (94)                  | 10.6% (62)                                    | 7.0% (45)                         | 8.5% (48)                       | 11.7% (25)                                                     | d<c, f                                             |
| Any Child Abuse                                                                  | 55.9%<br>(2275) | 54.4% (594)                                              | 53.3% (547)                | 59.4% (343)                                   | 54.9% (340)                       | 60.4% (332)                     | 56.9% (119)                                                    | a<c, e<br>b<c, e                                   |
| Number of Types                                                                  |                 |                                                          |                            |                                               |                                   |                                 |                                                                |                                                    |
| None                                                                             | 44.7%<br>(1798) | 46.4% (497)                                              | 47.1% (480)                | 41.3% (234)                                   | 45.7% (279)                       | 40.1% (218)                     | 43.9% (90)                                                     | c<a, b<br>e<a, b                                   |
| 1 type                                                                           | 40.4 (1622)     | 40.7% (436)                                              | 40.0% (408)                | 36.9% (209)                                   | 42.8% (261)                       | 43.4% (236)                     | 35.1% (72)                                                     | c<d, e<br>f<e                                      |
| 2 or more types                                                                  | 14.9% (598)     | 13.0% (139)                                              | 12.9% (132)                | 21.9% (124)                                   | 11.5% (70)                        | 16.5% (90)                      | 21.0% (43)                                                     | a<c, f                                             |

Child Abuse and Suicidal Behaviour in Canadian Public Safety Personnel

1  
2  
3  
4  
5  
6  
7  
8  
9  
10  
11  
12  
13  
14  
15  
16  
17  
18  
19  
20  
21  
22  
23  
24  
25  
26  
27  
28  
29  
30  
31  
32  
33  
34  
35  
36  
37  
38  
39  
40  
41  
42  
43  
44  
45  
46  
47

|  |  |  |  |  |  |  |  |  |                                  |
|--|--|--|--|--|--|--|--|--|----------------------------------|
|  |  |  |  |  |  |  |  |  | b < c, f<br>d < c, e, f<br>e < c |
|--|--|--|--|--|--|--|--|--|----------------------------------|

*Note.* Different lettered superscripts indicate PSP categories differ from one another at  $p < .05$ .

Confidential



## Child Abuse and Suicidal Behaviour in Canadian Public Safety Personnel

**Table 3: Associations between Child Abuse and Lifetime Suicide-Related Behaviours among Canadian Public Safety Personnel**

| All Public Safety Personnel                                             | Suicidal Ideation |                    | Suicide Plans |                    | Suicide Attempts |                    |
|-------------------------------------------------------------------------|-------------------|--------------------|---------------|--------------------|------------------|--------------------|
|                                                                         | PSP % (n)         | AOR (95% CI)       | PSP % (n)     | AOR (95% CI)       | PSP % (n)        | AOR (95% CI)       |
| Slapped on the face, head or ears or hit or spanked with something hard | 37.0% (642)       | 2.09 (1.8, 2.4)*** | 19.7% (335)   | 2.41 (2.0, 3.0)*** | 6.9% (118)       | 2.47 (1.8, 3.4)*** |
| Pushed, grabbed, shoved, or something thrown at                         | 44.0% (336)       | 2.32 (1.9, 2.8)*** | 24.4% (183)   | 2.42 (2.0, 3.0)*** | 9.8% (73)        | 2.96 (2.1, 4.1)*** |
| Kicked, bit, punched, choked, burned or attacked                        | 45.0% (227)       | 2.14 (1.7, 2.6)*** | 26.4% (131)   | 2.42 (1.9, 3.1)*** | 10.5% (52)       | 2.78 (1.9, 4.0)*** |
| Physical Abuse                                                          | 36.5% (681)       | 2.12 (1.8, 2.5)*** | 19.1% (351)   | 2.34 (1.9, 2.9)*** | 6.8% (125)       | 2.64 (1.9, 3.7)*** |
| Sexual Abuse                                                            | 42.5% (234)       | 2.12 (1.7, 2.6)*** | 23.2% (125)   | 2.06 (1.6, 2.7)*** | 10.6% (58)       | 2.38 (1.6, 3.4)*** |
| Exposure to IPV                                                         | 48.2% (161)       | 2.63 (2.1, 3.4)*** | 25.9% (85)    | 2.48 (1.9, 3.3)*** | 12.2% (40)       | 3.25 (2.2, 4.9)*** |
| Any Child Abuse                                                         | 35.6% (749)       | 2.22 (1.9, 2.6)*** | 18.5% (383)   | 2.49 (2.0, 3.1)*** | 6.5% (136)       | 2.61 (1.8, 3.8)*** |

Notes. Adjusted sex, age (continuous), marital status, province of residence, ethnicity, education, years of service (continuous) and PSP category; \* $p \leq .05$ ; \*\* $p \leq .01$ ; \*\*\* $p \leq .001$ .

Child Abuse and Suicidal Behaviour in Canadian Public Safety Personnel

**Table 4: Additive effects of Child Abuse and Career-Related Trauma on Lifetime Suicide Related Behaviours among Canadian Public Safety Personnel**

| All Public Safety Personnel             | Suicidal Ideation |                                             | Suicide Plans |                                              | Suicide Attempts |                                            |
|-----------------------------------------|-------------------|---------------------------------------------|---------------|----------------------------------------------|------------------|--------------------------------------------|
|                                         | % (n)             | AOR (95% CI)                                | % (n)         | AOR (95% CI)                                 | % (n)            | AOR (95% CI)                               |
| No Child Abuse/ CRT <sup>+</sup>        | 12.7% (16)        | 1.00                                        | --            | 1.00                                         | --               | 1.00                                       |
| Child Abuse Only <sup>+</sup>           | 31.6% (31)        | 3.33 <sup>a</sup> (1.6, 6.8) <sup>***</sup> | 16.5% (16)    | 5.89 <sup>a</sup> (1.9, 18.5) <sup>**</sup>  | --               | 3.98 <sup>a</sup> (1.0, 15.5) <sup>*</sup> |
| Career-Related Trauma Only <sup>+</sup> | 20.8% (322)       | 1.84 <sup>b</sup> (1.0, 3.3) <sup>*</sup>   | 8.9% (136)    | 3.00 <sup>b</sup> (1.1, 8.4) <sup>*</sup>    | 2.6% (40)        | 1.51 <sup>b</sup> (0.4, 5.1)               |
| CRT and Child Abuse <sup>+</sup>        | 35.8% (718)       | 3.97 <sup>a</sup> (2.3, 7.0) <sup>***</sup> | 18.6% (367)   | 7.12 <sup>a</sup> (2.6, 19.7) <sup>***</sup> | 6.4% (127)       | 3.80 <sup>a</sup> (1.2, 12.5) <sup>*</sup> |

Notes. <sup>+</sup> mutually exclusive categories; \* $p \leq .05$ ; \*\* $p \leq .01$ ; \*\*\* $p \leq .001$ ; AOR = Adjusted for sex, age (continuous) marital status, province of residence, ethnicity, education, years of service (continuous) and PSP category.  
 -- Not presented because of insufficient sample size (i.e.  $n < 10$ ).  
 Different lettered superscripts indicate significant differences between categories at  $p < .05$ .

**Table 5: Interaction effects between Child Abuse and Career-Related Trauma on Lifetime Suicide Related Behaviours among Canadian Public Safety Personnel**

| All Public Safety Personnel        |             | Suicidal Ideation AOR (95% CI) | Suicide Plans AOR (95% CI)     | Suicide Attempts AOR (95% CI)  |
|------------------------------------|-------------|--------------------------------|--------------------------------|--------------------------------|
| Model 1: Work Trauma               |             | 1.57 (1.1, 2.2) <sup>*</sup>   | 1.78 (1.1, 2.9) <sup>*</sup>   | 1.22 (0.6, 2.3)                |
| Model 2: Child Abuse               |             | 2.22 (1.9, 2.6) <sup>***</sup> | 2.49 (2.0, 3.1) <sup>***</sup> | 2.61 (1.8, 3.8) <sup>***</sup> |
| Model 3:                           | Work Trauma | 1.43 (0.99, 2.1)               | 1.59 (0.97, 2.6)               | 1.10 (0.6, 2.1)                |
|                                    | Child Abuse | 2.21 (1.9, 2.6) <sup>***</sup> | 2.47 (2.0, 3.1) <sup>***</sup> | 2.60 (1.8, 3.8) <sup>***</sup> |
| Model 4: Work Trauma X Child Abuse |             | 0.65 (0.3, 1.3)                | 0.40 (0.1, 1.3)                | 0.63 (0.2, 2.6)                |

Notes. \* $p \leq .05$ ; \*\* $p \leq .01$ ; \*\*\* $p \leq .001$   
 Model 1 & 2: Adjusted for sex, age (continuous) marital status, province of residence, ethnicity, education, years of service (continuous) and PSP category.

## Child Abuse and Suicidal Behaviour in Canadian Public Safety Personnel

Model 3: Adjusted for the same variables as in model 1 & 2 with the addition of work trauma and child abuse in the same model  
Model 4: Adjusted for the same variables as in model 3 with the main effects of work trauma and child abuse in addition to the interaction term for work trauma x child abuse.

Confidential
